# Supplementary material
Source: publisher figshare collection journal article supplement (https://springernature.figshare.com/ndownloader/files/7626937)
Supplement: Supplementary file 1 [file 7626937]

## Sheet: Group1
	Counts										Frequency
	HOST					PARASITE					HOST				PARASITE
Generation	Sp	Cl	Di	He	Sum	Sp	Cl	Di	He	Sum	Sp	Cl	Di	He	Sp	Cl	Di	He
1	4	3	5	0	12	3	4	3	2	12	0.333333	0.25	0.416667	0	0.25	0.333333	0.25	0.166667
2	5	2	5	0	12	5	3	3	1	12	0.416667	0.166667	0.416667	0	0.416667	0.25	0.25	0.0833333
3	5	0	7	0	12	5	2	1	4	12	0.416667	0	0.583333	0	0.416667	0.166667	0.0833333	0.333333
4	5	0	7	0	12	8	0	4	0	12	0.416667	0	0.583333	0	0.666667	0	0.333333	0
5	3	1	8	0	12	7	0	5	0	12	0.25	0.0833333	0.666667	0	0.583333	0	0.416667	0
6	1	2	9	0	12	3	0	9	0	12	0.0833333	0.166667	0.75	0	0.25	0	0.75	0
7	3	6	2	1	12	0	0	9	3	12	0.25	0.5	0.166667	0.0833333	0	0	0.75	0.25
8	5	6	0	1	12	1	2	7	2	12	0.416667	0.5	0	0.0833333	0.0833333	0.166667	0.583333	0.166667
9	3	8	0	1	12	3	6	1	2	12	0.25	0.666667	0	0.0833333	0.25	0.5	0.0833333	0.166667
10	6	5	0	1	12	2	9	0	1	12	0.5	0.416667	0	0.0833333	0.166667	0.75	0	0.0833333
11	7	4	0	1	12	2	10	0	0	12	0.583333	0.333333	0	0.0833333	0.166667	0.833333	0	0
12	10	1	0	1	12	3	9	0	0	12	0.833333	0.0833333	0	0.0833333	0.25	0.75	0	0
13	10	0	0	2	12	9	3	0	0	12	0.833333	0	0	0.166667	0.75	0.25	0	0
14	4	3	0	5	12	8	1	2	1	12	0.333333	0.25	0	0.416667	0.666667	0.0833333	0.166667	0.0833333
15	1	4		7	12	7	3	0	2	12	0.0833333	0.333333	0	0.583333	0.583333	0.25	0	0.166667

## Sheet: Group2
	Counts										Frequency
	HOST					PARASITE					HOST				PARASITE
Generation	Sp	Cl	Di	He	Sum	Sp	Cl	Di	He	Sum	Sp	Cl	Di	He	Sp	Cl	Di	He
1	5	2	4	1	12	2	4	3	3	12	0.416667	0.166667	0.333333	0.0833333	0.166667	0.333333	0.25	0.25
2	7	1	3	1	12	2	3	4	3	12	0.583333	0.0833333	0.25	0.0833333	0.166667	0.25	0.333333	0.25
3	6	0	4	2	12	6	2	4	0	12	0.5	0	0.333333	0.166667	0.5	0.166667	0.333333	0
4	5	0	5	2	12	10	0	2	0	12	0.416667	0	0.416667	0.166667	0.833333	0	0.166667	0
5	2	0	6	4	12	9	2	1	0	12	0.166667	0	0.5	0.333333	0.75	0.166667	0.0833333	0
6	0	0	7	5	12	6	0	4	2	12	0	0	0.583333	0.416667	0.5	0	0.333333	0.166667
7	0	0	7	5	12	0	0	8	4	12	0	0	0.583333	0.416667	0	0	0.666667	0.333333
8	1	1	4	6	12	0	0	8	4	12	0.0833333	0.0833333	0.333333	0.5	0	0	0.666667	0.333333
9	2	2	2	6	12	0	0	8	4	12	0.166667	0.166667	0.166667	0.5	0	0	0.666667	0.333333
10	4	3	0	5	12	0	0	4	8	12	0.333333	0.25	0	0.416667	0	0	0.333333	0.666667
11	3	4	0	5	12	2	2	1	7	12	0.25	0.333333	0	0.416667	0.166667	0.166667	0.0833333	0.583333
12	4	6	0	2	12	2	3	0	7	12	0.333333	0.5	0	0.166667	0.166667	0.25	0	0.583333
13	4	7	0	1	12	2	7	0	3	12	0.333333	0.583333	0	0.0833333	0.166667	0.583333	0	0.25
14	6	5	0	1	12	3	9	0	0	12	0.5	0.416667	0	0.0833333	0.25	0.75	0	0
15	9	2	0	1	12	3	9	0	0	12	0.75	0.166667	0	0.0833333	0.25	0.75	0	0

## Sheet: Group3
	Counts										Frequency
	HOST					PARASITE					HOST				PARASITE
Generation	Sp	Cl	Di	He	Sum	Sp	Cl	Di	He	Sum	Sp	Cl	Di	He	Sp	Cl	Di	He
1	2	3	3	4	12	4	2	2	4	12	0.166667	0.25	0.25	0.333333	0.333333	0.166667	0.166667	0.333333
2	2	3	2	5	12	4	2	3	3	12	0.166667	0.25	0.166667	0.416667	0.333333	0.166667	0.25	0.25
3	3	5	0	4	12	2	3	4	3	12	0.25	0.416667	0	0.333333	0.166667	0.25	0.333333	0.25
4	3	6	0	3	12	3	3	4	2	12	0.25	0.5	0	0.25	0.25	0.25	0.333333	0.166667
5	5	5	0	2	12	3	7	1	1	12	0.416667	0.416667	0	0.166667	0.25	0.583333	0.0833333	0.0833333
6	8	2	0	2	12	5	7	0	0	12	0.666667	0.166667	0	0.166667	0.416667	0.583333	0	0
7	7	2	0	3	12	9	3	0	0	12	0.583333	0.166667	0	0.25	0.75	0.25	0	0
8	5	4	0	3	12	12	0	0	0	12	0.416667	0.333333	0	0.25	1	0	0	0
9	0	6	0	6	12	12	0	0	0	12	0	0.5	0	0.5	1	0	0	0
10	0	7	0	5	12	1	2	4	5	12	0	0.583333	0	0.416667	0.0833333	0.166667	0.333333	0.416667
11	0	7	0	5	12	0	6	0	6	12	0	0.583333	0	0.416667	0	0.5	0	0.5
12	1	6	3	2	12	0	8	0	4	12	0.0833333	0.5	0.25	0.166667	0	0.666667	0	0.333333
13	2	2	5	3	12	0	12	0	0	12	0.166667	0.166667	0.416667	0.25	0	1	0	0
14	1	0	7	4	12	2	9	0	1	12	0.0833333	0	0.583333	0.333333	0.166667	0.75	0	0.0833333
15	0	0	10	2	12	1	3	3	5	12	0	0	0.833333	0.166667	0.0833333	0.25	0.25	0.416667

## Sheet: Group4
	Counts										Frequency
	HOST					PARASITE					HOST				PARASITE
Generation	Sp	Cl	Di	He	Sum	Sp	Cl	Di	He	Sum	Sp	Cl	Di	He	Sp	Cl	Di	He
1	5	1	5	1	12	2	4	2	4	12	0.416667	0.0833333	0.416667	0.0833333	0.166667	0.333333	0.166667	0.333333
2	4	2	4	2	12	5	2	4	1	12	0.333333	0.166667	0.333333	0.166667	0.416667	0.166667	0.333333	0.0833333
3	2	3	4	3	12	11	1	0	0	12	0.166667	0.25	0.333333	0.25	0.916667	0.0833333	0	0
4	0	4	5	3	12	7	0	2	3	12	0	0.333333	0.416667	0.25	0.583333	0	0.166667	0.25
5	0	3	4	5	12	3	2	3	4	12	0	0.25	0.333333	0.416667	0.25	0.166667	0.25	0.333333
6	0	6	3	3	12	2	3	2	5	12	0	0.5	0.25	0.25	0.166667	0.25	0.166667	0.416667
7	0	6	4	2	12	1	5	1	5	12	0	0.5	0.333333	0.166667	0.0833333	0.416667	0.0833333	0.416667
8	0	6	4	2	12	2	5	1	4	12	0	0.5	0.333333	0.166667	0.166667	0.416667	0.0833333	0.333333
9	0	4	6	2	12	0	9	0	3	12	0	0.333333	0.5	0.166667	0	0.75	0	0.25
10	0	1	9	2	12	0	9	0	3	12	0	0.0833333	0.75	0.166667	0	0.75	0	0.25
11	1	2	6	3	12	2	5	1	4	12	0.0833333	0.166667	0.5	0.25	0.166667	0.416667	0.0833333	0.333333
12	1	1	7	3	12	2	3	3	4	12	0.0833333	0.0833333	0.583333	0.25	0.166667	0.25	0.25	0.333333
13	1	1	7	3	12	1	0	7	4	12	0.0833333	0.0833333	0.583333	0.25	0.0833333	0	0.583333	0.333333
14	2	3	4	3	12	3	1	3	5	12	0.166667	0.25	0.333333	0.25	0.25	0.0833333	0.25	0.416667
15	1	3	6	2	12	4	0	1	7	12	0.0833333	0.25	0.5	0.166667	0.333333	0	0.0833333	0.583333

## Sheet: Group5
	Counts										Frequency
	HOST					PARASITE					HOST				PARASITE
Generation	Sp	Cl	Di	He	Sum	Sp	Cl	Di	He	Sum	Sp	Cl	Di	He	Sp	Cl	Di	He
1	2	6	1	3	12	4	3	3	2	12	0.166667	0.5	0.0833333	0.25	0.333333	0.25	0.25	0.166667
2	3	6	0	3	12	2	4	4	2	12	0.25	0.5	0	0.25	0.166667	0.333333	0.333333	0.166667
3	4	6	0	2	12	1	6	0	5	12	0.333333	0.5	0	0.166667	0.0833333	0.5	0	0.416667
4	5	5	0	2	12	1	8	0	3	12	0.416667	0.416667	0	0.166667	0.0833333	0.666667	0	0.25
5	8	3	0	1	12	0	9	0	3	12	0.666667	0.25	0	0.0833333	0	0.75	0	0.25
6	7	1	2	2	12	2	6	3	1	12	0.583333	0.0833333	0.166667	0.166667	0.166667	0.5	0.25	0.0833333
7	0	4	8	0	12	7	1	2	2	12	0	0.333333	0.666667	0	0.583333	0.0833333	0.166667	0.166667
8	2	4	2	4	12	2	2	6	2	12	0.166667	0.333333	0.166667	0.333333	0.166667	0.166667	0.5	0.166667
9	2	3	3	4	12	1	4	3	4	12	0.166667	0.25	0.25	0.333333	0.0833333	0.333333	0.25	0.333333
10	4	2	3	3	12	0	6	0	6	12	0.333333	0.166667	0.25	0.25	0	0.5	0	0.5
11	2	1	6	3	12	1	2	2	7	12	0.166667	0.0833333	0.5	0.25	0.0833333	0.166667	0.166667	0.583333
12	2	3	6	1	12	3	0	3	6	12	0.166667	0.25	0.5	0.0833333	0.25	0	0.25	0.5
13	2	3	6	1	12	1	4	3	4	12	0.166667	0.25	0.5	0.0833333	0.0833333	0.333333	0.25	0.333333
14	2	5	2	3	12	0	2	7	3	12	0.166667	0.416667	0.166667	0.25	0	0.166667	0.583333	0.25
15	6	1	2	3	12	0	5	5	2	12	0.5	0.0833333	0.166667	0.25	0	0.416667	0.416667	0.166667

## Sheet: Group6
	Counts										Frequency
	HOST					PARASITE					HOST				PARASITE
Generation	Sp	Cl	Di	He	Sum	Sp	Cl	Di	He	Sum	Sp	Cl	Di	He	Sp	Cl	Di	He
1	2	4	2	4	12	5	3	2	2	12	0.17	0.33	0.17	0.33	0.42	0.25	0.17	0.17
2	0	5	2	5	12	4	2	5	1	12	0	0.42	0.17	0.42	0.33	0.17	0.42	0.08
3	0	5	5	2	12	2	6	0	4	12	0	0.42	0.42	0.17	0.17	0.5	0	0.33
4	0	2	3	7	12	0	9	0	3	12	0	0.17	0.25	0.58	0	0.75	0	0.25
5	0	2	2	8	12	3	5	0	4	12	0	0.17	0.17	0.67	0.25	0.42	0	0.33
6	0	1	3	8	12	1	3	2	6	12	0	0.08	0.25	0.67	0.08	0.25	0.17	0.5
7	0	1	6	5	12	0	1	0	11	12	0	0.08	0.5	0.42	0	0.08	0	0.92
8	0	1	9	2	12	0	0	0	12	12	0	0.08	0.75	0.17	0	0	0	1
9	0	3	8	1	12	2	2	2	6	12	0	0.25	0.67	0.08	0.17	0.17	0.17	0.5
10	0	4	8	0	12	1	1	6	4	12	0	0.33	0.67	0	0.08	0.08	0.5	0.33
11	0	7	5	0	12	0	2	9	1	12	0	0.58	0.42	0	0	0.17	0.75	0.08
12	1	10	0	1	12	0	2	9	1	12	0.08	0.83	0	0.08	0	0.17	0.75	0.08
13	2	8	1	1	12	2	7	2	1	12	0.17	0.67	0.08	0.08	0.17	0.58	0.17	0.08
14	2	6	2	2	12	3	9	0	0	12	0.17	0.5	0.17	0.17	0.25	0.75	0	0
15	2	2	4	4	12	3	7	1	1	12	0.17	0.17	0.33	0.33	0.25	0.58	0.08	0.08

## Sheet: Group7
	Counts										Frequency
	HOST					PARASITE					HOST				PARASITE
Generation	Sp	Cl	Di	He	Sum	Sp	Cl	Di	He	Sum	Sp	Cl	Di	He	Sp	Cl	Di	He
1	4	3	3	2	12	4	3	3	2	12	0.333333	0.25	0.25	0.166667	0.333333	0.25	0.25	0.166667
2	5	0	3	4	12	3	6	3	0	12	0.416667	0	0.25	0.333333	0.25	0.5	0.25	0
3	5	0	3	4	12	3	6	3	0	12	0.416667	0	0.25	0.333333	0.25	0.5	0.25	0
4	4	0	4	4	12	3	7	2	0	12	0.333333	0	0.333333	0.333333	0.25	0.583333	0.166667	0
5	3	0	4	5	12	3	3	5	1	12	0.25	0	0.333333	0.416667	0.25	0.25	0.416667	0.0833333
6	3	0	5	4	12	2	0	8	2	12	0.25	0	0.416667	0.333333	0.166667	0	0.666667	0.166667
7	3	0	4	5	12	3	0	9	0	12	0.25	0	0.333333	0.416667	0.25	0	0.75	0
8	3	0	1	8	12	5	0	6	1	12	0.25	0	0.0833333	0.666667	0.416667	0	0.5	0.0833333
9	2	0	0	10	12	3	0	6	3	12	0.166667	0	0	0.833333	0.25	0	0.5	0.25
10	2	0	0	10	12	4	1	1	6	12	0.166667	0	0	0.833333	0.333333	0.0833333	0.0833333	0.5
11	2	0	0	10	12	1	1	4	6	12	0.166667	0	0	0.833333	0.0833333	0.0833333	0.333333	0.5
12	4	0	0	8	12	1	0	1	10	12	0.333333	0	0	0.666667	0.0833333	0	0.0833333	0.833333
13	8	0	0	4	12	2	1	3	6	12	0.666667	0	0	0.333333	0.166667	0.0833333	0.25	0.5
14	9	0	0	3	12	3	1	2	6	12	0.75	0	0	0.25	0.25	0.0833333	0.166667	0.5
15	9	2	0	1	12	6	1	2	3	12	0.75	0.166667	0	0.0833333	0.5	0.0833333	0.166667	0.25

## Sheet: Group8
	Counts										Frequency
	HOST					PARASITE					HOST				PARASITE
Generation	Sp	Cl	Di	He	Sum	Sp	Cl	Di	He	Sum	Sp	Cl	Di	He	Sp	Cl	Di	He
1	3	2	4	3	12	3	4	0	5	12	0.25	0.166667	0.333333	0.25	0.25	0.333333	0	0.416667
2	1	2	7	2	12	6	2	0	4	12	0.0833333	0.166667	0.583333	0.166667	0.5	0.166667	0	0.333333
3	2	3	5	2	12	2	4	5	1	12	0.166667	0.25	0.416667	0.166667	0.166667	0.333333	0.416667	0.0833333
4	4	2	3	3	12	0	6	6	0	12	0.333333	0.166667	0.25	0.25	0	0.5	0.5	0
5	6	2	0	4	12	0	3	9	0	12	0.5	0.166667	0	0.333333	0	0.25	0.75	0
6	6	4	2	0	12	3	2	3	4	12	0.5	0.333333	0.166667	0	0.25	0.166667	0.25	0.333333
7	6	3	0	3	12	5	2	3	2	12	0.5	0.25	0	0.25	0.416667	0.166667	0.25	0.166667
8	6	2	0	4	12	7	2	0	3	12	0.5	0.166667	0	0.333333	0.583333	0.166667	0	0.25
9	5	4	0	3	12	8	0	0	4	12	0.416667	0.333333	0	0.25	0.666667	0	0	0.333333
10	3	8	0	1	12	6	0	0	6	12	0.25	0.666667	0	0.0833333	0.5	0	0	0.5
11	4	8	0	0	12	3	2	3	4	12	0.333333	0.666667	0	0	0.25	0.166667	0.25	0.333333
12	5	7	0	0	12	2	4	3	3	12	0.416667	0.583333	0	0	0.166667	0.333333	0.25	0.25
13	6	6	0	0	12	3	6	1	2	12	0.5	0.5	0	0	0.25	0.5	0.0833333	0.166667
14	9	3	0	0	12	1	11	0	0	12	0.75	0.25	0	0	0.0833333	0.916667	0	0
15	12	0	0	0	12	3	9	0	0	12	1	0	0	0	0.25	0.75	0	0

## Sheet: Metapopulation
	Counts										Frequency
	HOST					PARASITE					HOST				PARASITE
Generation	Sp	Cl	Di	He	Sum	Sp	Cl	Di	He	Sum	Sp	Cl	Di	He	Sp	Cl	Di	He
1	27	24	27	18	96	27	27	18	24	96	0.28125	0.25	0.28125	0.1875	0.28125	0.28125	0.1875	0.25
2	27	21	26	22	96	31	24	26	15	96	0.28125	0.21875	0.270833	0.229167	0.322917	0.25	0.270833	0.15625
3	27	22	28	19	96	32	30	17	17	96	0.28125	0.229167	0.291667	0.197917	0.333333	0.3125	0.177083	0.177083
4	26	19	27	24	96	32	33	20	11	96	0.270833	0.197917	0.28125	0.25	0.333333	0.34375	0.208333	0.114583
5	27	16	24	29	96	28	31	24	13	96	0.28125	0.166667	0.25	0.302083	0.291667	0.322917	0.25	0.135417
6	25	16	31	24	96	24	21	31	20	96	0.260417	0.166667	0.322917	0.25	0.25	0.21875	0.322917	0.208333
7	19	22	31	24	96	25	12	32	27	96	0.197917	0.229167	0.322917	0.25	0.260417	0.125	0.333333	0.28125
8	22	24	20	30	96	29	11	28	28	96	0.229167	0.25	0.208333	0.3125	0.302083	0.114583	0.291667	0.291667
9	14	30	19	33	96	29	21	20	26	96	0.145833	0.3125	0.197917	0.34375	0.302083	0.21875	0.208333	0.270833
10	19	30	20	27	96	14	28	15	39	96	0.197917	0.3125	0.208333	0.28125	0.145833	0.291667	0.15625	0.40625
11	19	33	17	27	96	11	30	20	35	96	0.197917	0.34375	0.177083	0.28125	0.114583	0.3125	0.208333	0.364583
12	28	34	16	18	96	13	29	19	35	96	0.291667	0.354167	0.166667	0.1875	0.135417	0.302083	0.197917	0.364583
13	35	27	19	15	96	20	40	16	20	96	0.364583	0.28125	0.197917	0.15625	0.208333	0.416667	0.166667	0.208333
14	35	25	15	21	96	23	43	14	16	96	0.364583	0.260417	0.15625	0.21875	0.239583	0.447917	0.145833	0.166667
15	40	14	22	20	96	27	37	12	20	96	0.416667	0.145833	0.229167	0.208333	0.28125	0.385417	0.125	0.208333
